# Supplementary material for: Unraveling the impact of hydroxylation on interactions of bile acid cationic lipids with model membranes by in-depth calorimetry studies
Source: Royal Society of Chemistry journal article supplement (doi:10.1039/c4cp02283a), 2014-01-01
Supplement: c4cp02283a1.pdf [file c4cp02283a1.pdf]

## Supporting Information

### **Unraveling the Impact of Hydroxylation on Interactions of Bile Acid Cationic Lipids with Model Membranes by In-depth Calorimetry Studies**

Manish Singh and Avinash Bajaj\*

<sup>a</sup>The Laboratory of Nanotechnology and Chemical Biology, Regional Centre for Biotechnology,  
180 Udyog Vihar, Phase I, Gurgaon-122016, Haryana, India.

Corresponding author: Avinash Bajaj

E-mail: [bajaj@rcb.res.in](mailto:bajaj@rcb.res.in)

**Table S1.** Thermodynamic characterization of phase transition exhibited by DPPC liposomes doped with cationic bile acids **LCA-TMA**, **DCA-TMA**, **CDCA-TMA**, **CA-TMA** as determined from differential scanning calorimetry.

| Amphiphile      | Doping (%) | $T_m$<br>(°C) | $\Delta H_c$<br>(Kcal/mol) | $\Delta S$<br>(Cal/K.mol) | FWHM<br>( $\Delta T_{1/2}$ ) | $\Delta H_{vH}$<br>(Kcal/mol) | CU     |
|-----------------|------------|---------------|----------------------------|---------------------------|------------------------------|-------------------------------|--------|
| <b>DPPC</b>     | 100        | 35.67         |                            |                           |                              |                               |        |
|                 |            | 41.38         | 8.85                       | 28.2                      | 0.77                         | 882.52                        | 99.71  |
| <b>LCA-TMA</b>  | 5 mol%     | 40.74         | 7.70                       | 24.6                      | 1.63                         | 415.64                        | 53.97  |
|                 | 10 mol%    | 39.59         | 7.83                       | 25.1                      | 2.82                         | 238.60                        | 30.47  |
|                 | 20 mol%    | 39.02         | 8.05                       | 25.8                      | 3.899                        | 172.27                        | 31.40  |
|                 | 30 mol%    | 37.31         | 8.41                       | 27.1                      | 4.84                         | 137.06                        | 16.29  |
|                 | 50 mol%    | 36.42         | 8.79                       | 28.4                      | 5.81                         | 113.67                        | 12.93  |
| <b>CDCA-TMA</b> | 5 mol%     | 40.59         | 7.87                       | 25.2                      | 1.83                         | 368.77                        | 46.85  |
|                 | 10 mol%    | 39.59         | 8.07                       | 25.8                      | 3.00                         | 224.21                        | 27.78  |
|                 | 20 mol%    | 35.48         | 6.85                       | 25.9                      | 5.78                         | 113.45                        | 16.56  |
|                 |            | 39.06         | 1.00                       |                           | 2.24                         | 299.71                        | 299.71 |
|                 | 30 mol%    | 32.99         | 6.99                       | 30.1                      | 7.00                         | 92.23                         | 13.19  |
|                 | 50 mol%    | 37.22         | 2.14                       |                           | 3.26                         | 203.64                        | 95.16  |
| <b>DCA-TMA</b>  | 5 mol%     | 40.77         | 7.44                       | 23.7                      | 1.60                         | 422.31                        | 56.76  |
|                 | 10 mol%    | 39.69         | 7.73                       | 24.7                      | 2.90                         | 232.18                        | 30.03  |
|                 | 20 mol%    | 35.08         | 8.60                       | 27.9                      | 1.68                         | 388.97                        | 45.22  |
|                 | 30 mol%    | 34.64         | 9.57                       | 31.1                      | 1.33                         | 488.44                        | 51.03  |
|                 | 50 mol%    | 34.36         | 11.0                       | 35.8                      | 1.65                         | 393.99                        | 35.81  |
| <b>CA-TMA</b>   | 5 mol%     | 41.26         | 7.98                       | 25.4                      | 1.72                         | 394.91                        | 49.48  |
|                 | 10 mol%    | 41.05         | 8.33                       | 26.5                      | 2.13                         | 318.07                        | 38.18  |
|                 | 20 mol%    | 39.09         | 8.88                       | 278.5                     | 2.30                         | 291.09                        | 32.78  |
|                 | 30 mol%    | 37.66         | 10.04                      | 32.3                      | 1.46                         | 455.60                        | 45.37  |
|                 | 50 mol%    | 37.33         | 11.43                      | 36.8                      | 1.09                         | 609.15                        | 53.29  |

**Table S2.** Thermodynamic characterization of phase transition exhibited by DPPC liposomes doped with cationic bile acids **LCA-DME**, **CDCA-DME**, **DCA-DME**, **CA-DME** as determined from differential scanning calorimetry.

| Amphiphile      | Doping (%) | $T_m$<br>(°C) | $\Delta H_c$<br>(Kcal/mol) | $\Delta S$<br>(Cal/K.mol) | FWHM<br>( $\Delta T_{1/2}$ ) | $\Delta H_{vh}$<br>(Kcal/mol) | CU    |
|-----------------|------------|---------------|----------------------------|---------------------------|------------------------------|-------------------------------|-------|
| <b>DPPC</b>     | 100        | 35.67         |                            |                           |                              |                               |       |
|                 |            | 41.38         | 8.85                       | 28.2                      | 0.77                         | 882.52                        | 99.71 |
| <b>LCA-DME</b>  | 5 mol%     | 40.92         | 7.43                       | 23.7                      | 1.583                        | 371.08                        | 49.94 |
|                 | 10 mol%    | 40.32         | 8.48                       | 27.1                      | 2.20                         | 307.73                        | 36.28 |
|                 | 20 mol%    | 38.75         | 8.00                       | 25.7                      | 4.31                         | 155.32                        | 19.41 |
|                 | 30 mol%    | 37.41         | 8.34                       | 26.3                      | 5.85                         | 113.48                        | 13.60 |
|                 | 50 mol%    | 33.16         | 10.05                      | 32.0                      | 8.11                         | 79.73                         | 7.93  |
| <b>CDCA-DME</b> | 5 mol%     | 40.49         | 7.5                        | 23.9                      | 1.76                         | 385.23                        | 51.36 |
|                 | 10 mol%    | 39.23         | 8.02                       | 25.0                      | 3.53                         | 190.21                        | 23.71 |
|                 | 20 mol%    | 33.80         | 6.23                       | 28.0                      | 5.89                         | 110.16                        | 17.68 |
|                 |            | 38.43         | 2.22                       |                           | 3.26                         | 204.95                        | 91.99 |
|                 | 30 mol%    | 30.72         | 4.20                       | 30.3                      | 2.22                         | 286.17                        | 68.13 |
|                 |            | 35.80         | 5.08                       |                           | 5.28                         | 124.45                        | 24.49 |
| 50 mol%         | 30.09      | 4.51          | 33.6                       | 5.39                      | 117.50                       | 26.05                         |       |
| <b>DCA-DME</b>  | 5 mol%     | 34.10         | 4.79                       |                           | 3.24                         | 200.59                        | 41.87 |
|                 |            | 40.52         | 8.29                       | 26.0                      | 1.75                         | 385.43                        | 46.49 |
|                 |            | 39.42         | 8.44                       | 27.0                      | 3.24                         | 207.32                        | 24.56 |
|                 |            | 34.93         | 10.08                      | 32.0                      | 1.11                         | 585.05                        | 58.04 |
|                 |            | 34.76         | 10.62                      | 34.0                      | 1.19                         | 545.10                        | 51.32 |
| <b>CA-DME</b>   | 5 mol%     | 34.49         | 11.06                      | 36.0                      | 1.06                         | 610.85                        | 55.23 |
|                 |            | 40.86         | 8.46                       | 26.9                      | 1.58                         | 429.46                        | 50.76 |
|                 |            | 39.89         | 8.27                       | 26.9                      | 1.72                         | 392.40                        | 47.44 |
|                 |            | 37.89         | 8.65                       | 27.8                      | 1.42                         | 463.39                        | 54.26 |
|                 |            | 36.99         | 9.92                       | 32.0                      | 1.34                         | 494.81                        | 49.88 |
| 50 mol%         | 36.34      | 10.38         | 33.6                       | 1.19                      | 553.59                       | 53.33                         |       |
